# Supplementary material for: An Age-Period-Cohort And Joinpoint Analysis Of Colorectal Cancer Incidence Trends in Ho Chi Minh City, Vietnam(1996-2015)
Source: Research Square preprint supplement (doi:10.21203/rs.3.rs-396679/v1), 2021-04-14
Supplement: Supplementary file 1 [file 641aee246bd52de11e22dd87.docx]

**Table 3** APC analysis of CRC incidence by gender in Ho Chi Minh City, Vietnam during 1996-2015.

| **Group** | **Men** | | | **Women** | |
| --- | --- | --- | --- | --- | --- |
| **Effect** | | **95% CI** | **Effect** | **95% CI** |
| **Age** |  | |  |  |  |
| 30-34 | 1.30 | | 0.91 - 1.86 | 1.41 | 0.97 - 2.05 |
| 35-39 | 2.05 | | 1.53 – 2.76 | 2.09 | 1.52 - 2.87 |
| 40-44 | 4.27 | | 3.34 – 5.45 | 3.65 | 2.79 - 4.77 |
| 45-49 | 7.66 | | 6.19 - 9.49 | 6.71 | 5.37 - 8.39 |
| 50-54 | 16.54 | | 13.81 - 19.82 | 12.57 | 10.37 - 15.22 |
| 55-59 | 38.02 | | 32.39 - 44.62 | 23.70 | 20.09 - 27.97 |
| 60-64 | 89.26 | | 77.85 - 102.34 | 48.31 | 41.93 - 55.66 |
| 65-69 | 135.54 | | 119.29 - 154.00 | 60.76 | 52.72 - 70.02 |
| 70-74 | 213.68 | | 178.80 - 255.37 | 85.77 | 71.50 - 102.89 |
| 75-79 | 252.74 | | 206.31 - 309.60 | 100.06 | 81.34 - 123.08 |
| 80-84 | 320.81 | | 251.06 - 409.94 | 123.28 | 96.95 - 156.76 |
| 85-89 | 375.32 | | 275.39 - 511.52 | 99.49 | 73.16 - 135.31 |
| **Period** |  | |  |  |  |
| 1996-2000 | 1.01 | | 0.90 - 1.14 | 1.22 | 1.09 - 1.37 |
| 2001-2005 | 1.00 | | 1.00 - 1.00 | 1.00 | 1.00 - 1.00 |
| 2006-2010 | 1.19 | | 1.07 - 1.32 | 1.22 | 1.09 - 1.35 |
| 2011-2015 | 1.86 | | 1.69 - 2.05 | 1.71 | 1.55 - 1.90 |
| **Cohort** |  | |  |  |  |
| 1911-1915 | 0.34 | | 0.19 - 0.60 | 0.41 | 0.23 - 0.73 |
| 1916-1920 | 0.32 | | 0.22 - 0.47 | 0.53 | 0.37 - 0.76 |
| 1921-1925 | 0.32 | | 0.24 - 0.43 | 0.61 | 0.46 - 0.80 |
| 1926-1930 | 0.43 | | 0.35 - 0.54 | 0.63 | 0.50 - 0.79 |
| 1931-1935 | 0.50 | | 0.41 - 0.60 | 0.76 | 0.63 - 0.93 |
| 1936-1940 | 0.57 | | 0.48 - 0.68 | 0.79 | 0.66 - 0.94 |
| 1941-1945 | 0.68 | | 0.58 - 0.80 | 0.92 | 0.78 - 1.08 |
| 1946-1950 | 1.00 | | 1.00 - 1.00 | 1.00 | 1.00 - 1.00 |
| 1951-1955 | 1.31 | | 1.12 - 1.54 | 1.37 | 1.16 - 1.62 |
| 1956-1960 | 1.89 | | 1.58 - 2.27 | 1.70 | 1.40 - 2.05 |
| 1961-1965 | 2.12 | | 1.72 - 2.62 | 1.68 | 1.35 - 2.11 |
| 1966-1970 | 2.30 | | 1.79 - 2.95 | 1.64 | 1.25 - 2.15 |
| 1971-1975 | 2.26 | | 1.68 - 3.04 | 1.69 | 1.22 - 2.34 |
| 1976-1980 | 2.73 | | 1.89 - 3.93 | 2.35 | 1.61 - 3.42 |
| 1981-1985 | 2.81 | | 1.72 - 4.59 | 1.87 | 1.11 – 3.15 |
|  | | Wald Chi-Square tests for estimable functions, p Value | | | |
| **Net Drift = 0** | | <0.0001 | | <0.0001 | |
| **All period RR = 1** | | <0.0001 | | <0.0001 | |
| **All cohort RR = 1** | | <0.0001 | | <0.0001 | |
| **All local drifts = Net Drift** | | 0.0006 | | 0.0456 | |
